# Supplementary material for: hERG1 channels drive tumour malignancy and may serve as prognostic factor in pancreatic ductal adenocarcinoma
Source: PubMed Central journal article supplement — Br J Cancer. 2015 Feb 26;112(6):1076–87. doi: 10.1038/bjc.2015.28 (PMC4366888; doi:10.1038/bjc.2015.28), 2015-02-26
Supplement: bjc201528x1.pdf [file bjc201528x1.pdf]

## SUPPLEMENTARY INFORMATION

### Materials and Methods of experiments on primary samples

#### *TMA construction*

Sufficient paraffin-embedded tissue for TMA construction was available in all cases. Formalin-fixed paraffin embedded tissues were first examined with H&E staining using whole sections to identify pathologically distinct areas of interest (tumour and adjacent normal). TMAs were constructed by punching 1.0mm discs and re-embedding them into a new paraffin block. From each sample, 4 cores (2 for neoplastic tissue and 2 for normal pancreas) of 1mm diameter were obtained from the donor block and transferred to receiver blocks using Quick-Ray<sup>®</sup> Tissue Micro Arrayer. Therefore, each receiver block was made of 60 cores belonging to 15 patients. Each TMA block was cut into 3µm sections and H&E staining was performed on every 25 section to assess retention of cancer tissue.

To ensure a reliable evaluation of immunostaining in each patient, TMAs were properly assembled (at the Campus Bio-Medico University of Rome) to allow the direct comparison of the neoplastic sample with its normal counterpart.

#### *Immunohistochemistry*

The sections were dewaxed and re-hydrated, endogenous peroxidases were blocked and antigen retrieval was performed with either Proteinase K (5µg/ml, for hERG1) or citrate buffer (pH 7.8 for Ki67 and pH 6.0 for EGF-R). Antibody dilutions were: 1:200 and 1:500 for the unpurified or purified α-hERG1-moAb, respectively, 1:100 for EGF-R (Santa Cruz Biotechnology) and 1:50 for Ki-67. Immunostaining was performed with a commercially available kit (PicTure Max kit and DAB, Invitrogen) according to manufacturer's instructions. To validate data obtained with anti-hERG1 antibodies we performed IHC on the same sets of samples also using the fully automated IHC and ISH Leica BOND-MAX system.

#### *Scoring assessment*

When evaluating IHC, no staining was scored as 0, 1–25% of stained cells was scored as 1, 26–50% as 2, 51–75% as 3, and 76–100% as 4. Staining intensity was rated on a scale of 0–3, with 0 = negative; 1 = weak; 2 = moderate, and 3 = strong. The raw data were converted to the IHS score by multiplying the quantity and staining intensity scores. An IHS score ≥6 was considered as hERG1 positivity. Ki67 staining was evaluated by counting the number of positively stained nuclei and immunoreactivity was categorized by the percentage of nuclear staining. Samples were evaluated by two independent investigators (GP and EL). The study was conducted in a blinded fashion so that patients' outcomes were unknown to investigators performing IHC analyses.

### Materials and Methods of molecular biology experiments

#### *Real time Quantitative PCR (RQ-PCR)*

Primers were as follows: hERG1 forward, 5' ACGTCTCTCCCAACACCAAC 3'; reverse, 5' GAGTACAGCCGCTGGATGAT 3'; and β-actin forward, 5' CAACGGCTCCGGCATGTG 3'; reverse, 5' CTTGCTCTGGGCCTCGTC 3'. The primers were used at a final concentration of 100nM.

## 1 **Materials and Methods of *in vitro* experiments**

### 2 ***Protein extraction, Immunoprecipitation (IP) and Western Blotting (WB)***

3 Proteins (2 mg for cell line extracts and 1 mg for primary samples) were immunoprecipitated  
4 overnight at 4°C with anti-EGF-R (4µg/mg, sc-03 Santa Cruz Biotechnology) or with the purified  
5 α-hERG1-moAb antibody (5µg/mg) using protein A/G beads (Santa Cruz Biotechnology). WBs  
6 were performed using the following antibodies diluted in T-PBS BSA 5%: anti-pan-hERG1 (C54)  
7 (1:1000, DIVAL Toscana Srl), anti-EGF-R (1:200 sc-03, Santa Cruz Biotechnology), anti-tubulin  
8 (1:500, Sigma Aldrich).

### 9 10 ***Immunofluorescence (IF) laser confocal microscopy***

11 IF experiments were performed employing α-hERG1-moAb directed against an extracellular  
12 epitope of the protein, without permeabilisation. Affinity purified mouse α-hERG1-moAb (DIVAL  
13 Toscana Srl) was diluted in blocking solution (PBS containing 10% BSA) to a final concentration  
14 of 1µg/ml and incubated overnight at 4°C. Alexa Fluor 488 labelled secondary anti-mouse antibody  
15 (Invitrogen) diluted in blocking solution (1:500) was used and incubated 1 hour at room  
16 temperature in the dark. Coverslips were mounted using fluorescence ProLong antifade mounting  
17 solution with DAPI (Invitrogen). Sequential images at 0.22µm intervals were obtained with C1  
18 confocal microscope (Nikon) using laser excitation wavelength of 488 nm.

### 19 20 ***Cell migration assay***

21 Cells were seeded on a "Basement membrane" consisting of RPMI 5X, HEPES (50 mmol/l), NaOH  
22 (1mol/l), laminin (0.1 mg/ml) fibronectin (1 mg/ml), Collagen IV (1 mg/ml). Migration was  
23 monitored for 5h for calculation of migration speed (µm/min) and distance covered within the  
24 experimental period (µm).

### 25 26 ***Cell viability assay***

27 Cells viability was assessed using WST-1 assay (Roche, Mannheim, Germany). Cells were seeded  
28 in 96-well cell culture plates. After cell adhesion and spreading, cell medium containing EGF  
29 (20ng/ml) in the presence or not of E4031 (40µM) was added and cells were cultured for six hours  
30 in a humidified incubator at 37°C and 5% CO<sub>2</sub>. Then medium was replaced adding 90µl of  
31 DMEM+10% FCS+ 20ng/ml EGF and WST-1 reagent (10 µl) was added into each well followed  
32 by incubation at 37°C for one hour. Then, the formazan dye formed after WST-1 cleavage carried  
33 out by living cells, was measured at 450 nm. The absorbance values were reported as ratio of mean  
34 absorbance values between treated and control primary cultures.

## 35 36 **Materials and Methods of *in vivo* experiments**

### 37 38 ***Cells***

39 MIAPaCa-2 cell line, transfected with pGL4.51 [luc2/Neo] plasmid was used for tumour cell  
40 implantation. Cells were cultured in DMEM supplemented with Lglutamine (4 mM), 10% foetal  
41 bovine serum and geneticin (G418) (2.4 mg/ml) (Gibco) at 37°C in a humidified atmosphere of 5%  
42 CO<sub>2</sub>. Cells were harvested by a brief trypsinisation from semiconfluent culture dishes, washed  
43 several times, and collected in sterile PBS shortly before implantation. Cells were tested for  
44 microbial contamination (including mycoplasma) using a PCR-based analysis and were found to be  
45 negative.

### 46 47 ***Mouse Models***

1 Mice were maintained in a sterile environment on daily twelve-hour light/dark cycles. Cages,  
2 bedding, and water were autoclaved, and the food was gamma irradiated. All manipulations were  
3 conducted under aseptic conditions using a laminar flow hood.  
4 MIAPaCa-2-luc cells were injected into the pancreas of nu/nu mice and the animals were monitored  
5 by bioluminescence optical imaging at different time after injection. Seven days after injection,  
6 when no tumour mass was yet palpable, the counts per minute (cpm) were barely detectable.  
7 Afterwards, a progressive increase in the signal was observed, the maximum cpm value being  
8 reached 4 weeks after cell injection. At that time, local tumour growth occurred and complications  
9 such as stomach or intestinal obstruction occurred, accompanied by rapid weight loss and  
10 malnutrition. 4 weeks after cell injection mice were sacrificed and pancreatic tumour masses  
11 excised and examined. The mean value of the tumour masses was  $378 \pm 32$  mm<sup>3</sup>. Tumours were  
12 predominantly poorly differentiated, with a high degree of vascularisation.  
13 We generated cohorts of *KPC* triple transgenic mice, interbreeding firstly *Pdx-1-Cre* mice with  
14 (Lox-STOP-Lox) *LSL-Kras*<sup>G12D/+</sup> mice (Hingorani et al, 2003) and then the resulting double  
15 transgenic *Pdx-1-Cre,LSL-Kras*<sup>G12D/+</sup> mice with *LSL-Trp53*<sup>R172H/+</sup> mice (Hingorani et al, 2005).  
16 Transgenic mice expressing Cre recombinase under the control of pancreas-specific *Pdx-1*  
17 promoter were crossed with *LSL-Kras*<sup>G12D/+</sup> mice. Among the progeny, *Pdx-1-Cre,LSL-Kras*<sup>G12D/+</sup>  
18 mice were crossed with *LSL-Trp53*<sup>R172H/+</sup> mice to obtain KPC mice. Based on these procedures, the  
19 progenitor cells of the developing pancreas of KPC transgenic mice expressed rearranged and  
20 activated *Kras*<sup>G12D</sup> and *Trp53*<sup>R172H</sup> alleles. Mice were maintained on a C57BL6 background,  
21 in plastic cages with a wire mesh providing isolation from the hygienic bed and were kept in  
22 temperature-, air-, and light-controlled conditions. They received food and water *ad libitum*.  
23 Mice were genotyped by PCR analysis of genomic tail DNA, and they were monitored daily and  
24 sacrificed by cervical dislocation when they became moribund. Organs and tumors were explanted  
25 and fixed in PBS 4% formaldehyde for 24 h, then the samples were embedded in paraffin and cut  
26 into 7µm section used for IHC analysis (see below).

27

### 28 ***Tumour implantation***

29 For orthotopic transplantation, general anaesthesia was performed by intraperitoneal application  
30 using Avertin (350 mg/kg) (Sigma). A median laparotomy was performed, approximately one cm in  
31 length; the peritoneum was opened, and the pancreas was carefully exposed by applying gentle  
32 traction at the stomach. Aliquot of  $1 \times 10^6$  MIA PaCa-luc2 tumour cells in a volume of 10µl PBS  
33 was injected with an insulin syringe, 30 gauge, very slowly into the proximal part of the pancreas.  
34 Cells were implanted to visibly infiltrate the pancreatic tissue. The needle was slowly withdrawn  
35 after one-minute delay. The pancreas was then returned to the abdominal cavity, and the incision  
36 was closed in two layers using a continuous 4-0 Vicryl suture for the peritoneum and an interrupted  
37 suture for the skin. All animals tolerated the procedure well. After implantation, mice were  
38 inspected weekly for body weight loss, general condition, and tumour formation in the peritoneal  
39 cavity through bioluminescent optical imaging.

40

### 41 ***Tumour imaging***

42 α-hERG1-moAb was conjugated with Alexa Fluor dye, according to protocol from the SAIIVI  
43 Alexa Fluor 680 Antibody labelling kit (Invitrogen). Briefly, Alexa Fluor NHS esters were  
44 incubated with the protein in a basic medium (pH 9.3). Labelled α-hERG1-moAb was isolated and  
45 purified by gel filtration. The final dye-to-protein ratio (number of Alexa Fluor molecules coupled  
46 to each protein molecule) was between 2.5 and 3.5, according to manufacturer's instructions. All of  
47 the fluorescently labelled protein samples were aliquoted and stored in the dark at -80°C. All the  
48 fluorescent emission spectra were measured using Photon imager (Biospace Lab). The imager had a  
49 laser source for fluorescence excitation ( $\lambda=679$ nm), an emission filter ( $\lambda=702$ nm) for fluorescence  
50 detection, and a computer for data analysis. To analyse the specific target accumulation of the  
51 imaging probes, mice were injected with Alexa 680-labelled α-hERG1-moAb and 3 days after

1 injection, animal were anaesthetized, shaved and immunofluorescence was measured in whole  
2 animal and, after sacrifice, in the explanted organs.  
3 For bioluminescent imaging anaesthetized mice bearing orthotopic tumours were injected  
4 intraperitoneally with 150mg/kg of XenoLight RediJect D-Luciferin (Caliper Life Sciences).  
5 Animals were imaged five minutes after Luciferin injection using the Photon imager (Biospace  
6 Lab). The stage is at a constant temperature of 37°C to maintain body temperature in the animals.  
7 An integration time of three minutes was used for bioluminescent image acquisition. Time profiles  
8 were generated for each of the signals bounded by circular region of interest (ROI) on the abdomen  
9 of each mouse.

10

### 11 ***Tumour harvesting and IHC***

12 Animals were killed by cervical dislocation; organs and tumours were removed and fixed in 4%  
13 buffered formaldehyde for 24 h and embedded in paraffin. Tissue sections (7µm) were cut from  
14 blocks using a microtome (Leica RM2125/RM2125RT) mounted on positively charged slides for  
15 IHC analysis. After dewaxing and blocking endogenous peroxidases, sections were treated with  
16 proteinase K (Roche; 5 µg/mL in PBS) and UltraVBlock solution (LabVision) containing 0.1%  
17 Triton X-100, and then incubated with the anti-mERG1 monoclonal antibody (Lastraioli et al, 2012)  
18 (dilution 1:200 in PBS-UltraVBlock), overnight at 4°C. Immunostaining was carried out using a  
19 commercially available kit (PicTure Plus kit; Zymed). After washing with PBS, colour was  
20 developed by incubating the slides with the 3,3'-diamino-benzidine chromogen solution for 1-2  
21 mins. Slides were then counterstained with Mayer's hematoxylin and mounted using Entellan  
22 mounting medium. Images were acquired on a Leica DM4000B microscope with a Leica DFC 320  
23 camera using Leica Win software (Leica Microsystems; Milan, Italy).

24

1 **Figures**

2  
3  
4  
5  
6  
7  
8

**Figure S1-** EGF-R expression in MIAPaCa-2 and PANC-1 cell lines, evaluated by Western Blotting on total protein extracts. 30 µg of total protein were loaded. EGF-R detection was performed using an anti-EGF-R antibodies (Santa Cruz, SC- 03, dilution 1:200).

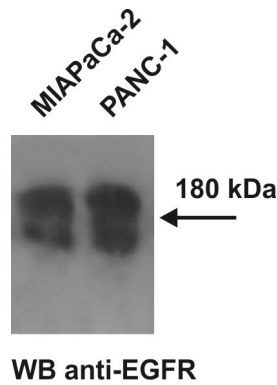

9  
10  
11  
12  
13  
14  
15  
16  
17  
18  
19  
20  
21  
22  
23  
24  
25  
26  
27  
28  
29  
30  
31  
32  
33  
34  
35  
36

**Figure S2.** PCR for genotyping KPC transgenic mice. Genomic DNA was isolated using a Chelex protocol by incubation of a 0.2 cm of mice tails in 150 µl of 10% (w/v in water) Chelex 100 resin (BIO-RAD) for 4 h 25 at 56°C and 30 min at 98°C. PCR analysis were performed using Platinum® PCR SuperMix (Life Technologies), according to the manufacturer's instructions.

A) Amplification of *Cre* was performed with a specific primer pair: 5'-ACCAGCCAGCTATCAACTCG-3' and 5'-TTACATTGGTCCAGCCACC-3', which amplify a 200bp fragment, applying the following PCR conditions: denaturation at 94°C for 2 min, 35 cycles at 94°C for 1 min, 60°C for 1 min, 72°C for 1 min, and a final extension cycle at 72°C for 3 min. Amplification of the *interleukin-2* (*IL-2*) gene by PCR was systematically performed on DNA as an internal PCR control, using the following primer pair: 5'-CTAGGCCACAGAATTGAAAGATCT-3' and 5'-GTAGGTGGAAATTCTAGCATCATCC-3', which amplify a 350bp fragment.

B) Amplification of *Kras* was performed with the following primers: forward 1: 5'-GTCTTTCCCCAGCACAGTGC-3'; reverse 1: 5'-CTCTTGCCTACGCCACCA GCTC-3'; reverse 2: 5'-AGCTAGCCACCATGGCTTGAGTAAGTCTGCA-3', to detect the LSL-cassette (500bp) and the wt allele (620bp), applying the following PCR conditions: denaturation at 95°C for 2 min, 35 cycles at 95°C for 30 sec, 61°C for 30 sec, 72°C for 45 sec and a final extension cycle at 72°C for 10 min.

C) Amplification of *Trp53* was performed using the following primers (Jacks Lab): forward 1 (SD5'): 5'-AGCTAGCCACCATGGCTTGAGTAAGTCTGCA-3'; forward 2 (DT050500.2): 5'-TTACACATCCAGCCTCTGTGG-3'; reverse 1 (DT011200.3): 5'-CTTGGAGACATAGCCACACTG-3', to detect the LSL-cassette (270bp) and the wt allele (170bp), applying the following PCR conditions: denaturation at 94°C for 3 min, 31 cycles at 94°C for 1 min, 60°C for 1 min 30 sec, 72°C for 2 min and a final extension cycle at 72°C for 5 min.

-: water as negative control; +: positive PCR control.

37

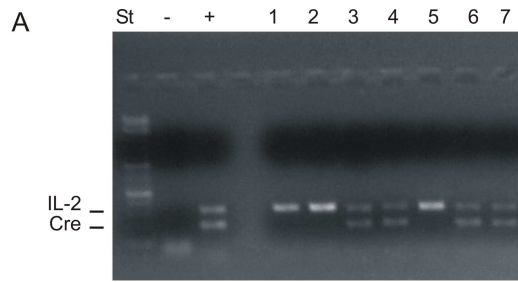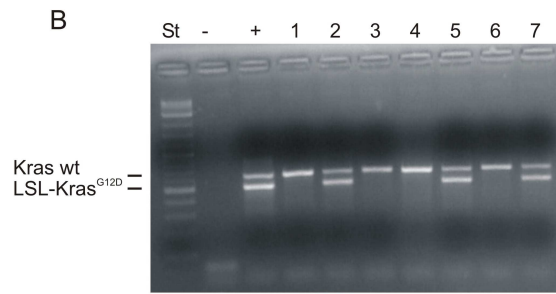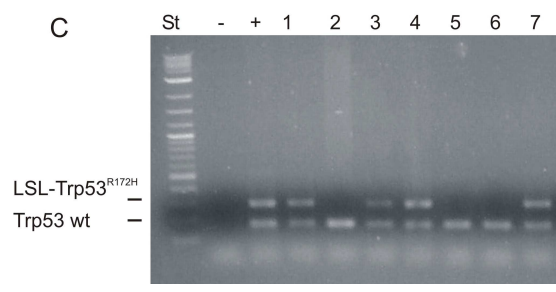

1  
2  
3

1 **Figure S3. Histological characterization of a representative tumour mass in a KPC mouse.**  
2 Haematoxylin & Eosin staining. A) Low power picture in which tumour tissue architecture appears  
3 completely irregular and subverted when compared to healthy pancreatic tissue. The tissue is  
4 characterized by extensive necrosis (arrow). B) Higher power microphotograph of the same tumour  
5 mass as in A. Magnification: 10x (A) and 40x (B).  
6  
7  
8

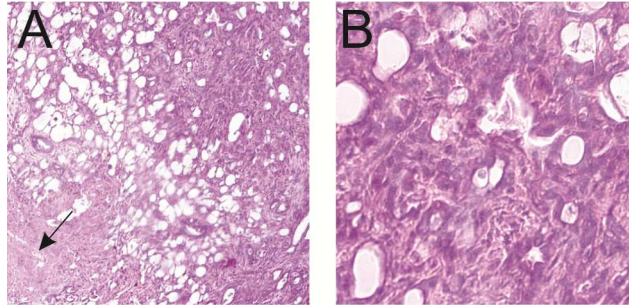

9  
10  
11 **Figure S4- Relationship between hERG1 expression and proliferation in PDAC primary samples.**  
12 A) Immunohistochemistry for hERG1. B) Immunohistochemistry for Ki67 in the same sample as in  
13 A). Magnification 20x.  
14  
15  
16

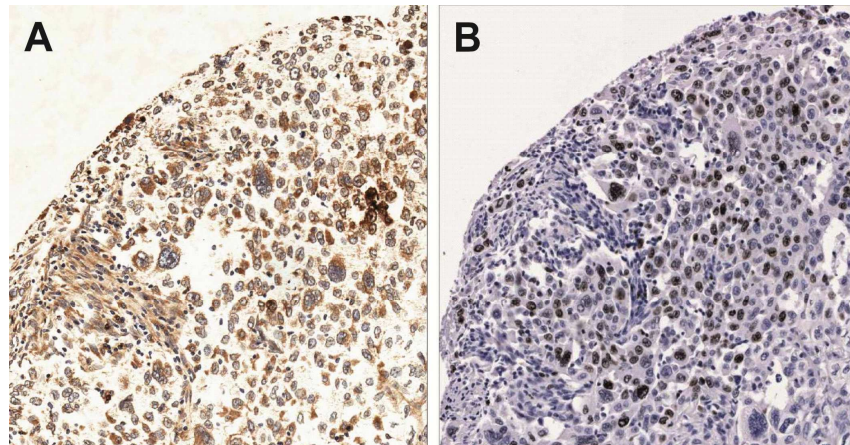

17  
18  
19  
20  
21  
22 **Figure S5. *In vivo* bioluminescent optical imaging of tumour growth.** Panels represent sequential  
23 imaging of a single mouse taken on days 7, 14, 25 and 28 after surgical orthotopic implantation of  
24 MIAPaCa-luc2.  
25

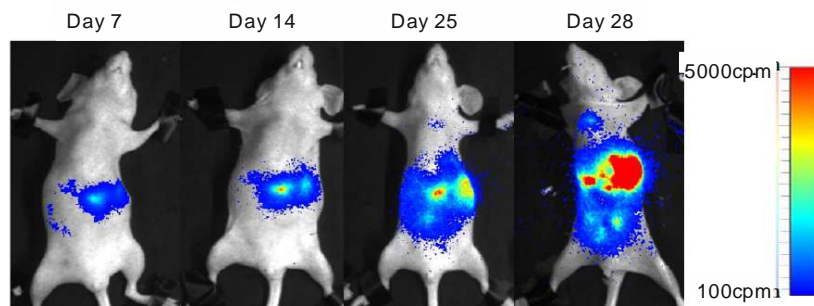



1  
2  
3  
4  
5

**Figure S6.** Quantification of tumour bioluminescence. Values represent the mean counts per minute (cpm)  $\pm$  S.E. for a group of 16 mice. Progression of disease had a strong correlation with survival.

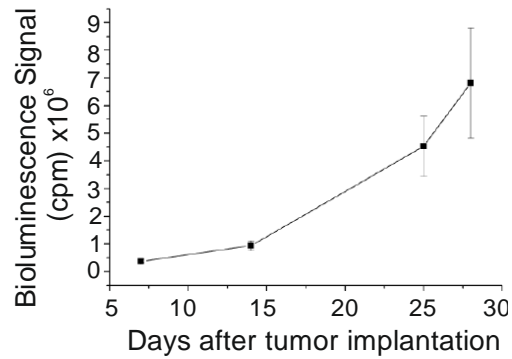

6  
7  
8  
9

**Figure S7. Histological characterization of primary MIA-PaCa-luc2 tumours.** A-C) Haematoxylin & Eosin staining. Tumours were predominantly poorly differentiated, showed a high degree of vascularization (inset to panel B) and were composed of pleomorphic cells. Despite the presence of new blood vessels, tumours were associated with fairly extensive areas of degeneration and necrosis (panel C); D-E) hERG1-mAb staining. Immunohistochemical staining of tumour tissue demonstrated a strong positivity for hERG1, whereas hERG1-mAb did not stain healthy tissue (panel E). Magnification: 10x (A, B, C, D) and 40x (inset to B, E).

17

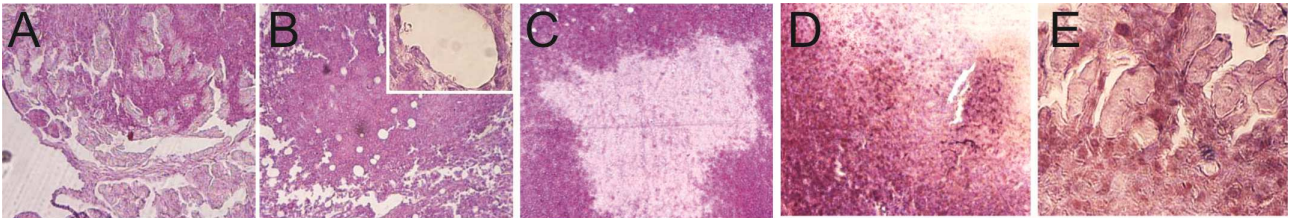

18  
19  
20  
21



## Tables

**Table S1.** Clinicopathological characteristics of the PDAC patients.

| Variable Category | Number of Patients |
|-------------------|--------------------|
| <b>Gender</b>     |                    |
| Female            | 21                 |
| Male              | 23                 |
| <b>T stage</b>    |                    |
| T1                | 0                  |
| T2                | 7                  |
| T3                | 38                 |
| <b>N stage</b>    |                    |
| N0                | 17                 |
| N1                | 27                 |
| <b>M stage</b>    |                    |
| M0                | 41                 |
| M1                | 3                  |
| <b>Staging</b>    |                    |
| I                 | 18                 |
| II                | 23                 |
| III               | 0                  |
| IV                | 3                  |
| <b>Grading</b>    |                    |
| Grade 1           | 3                  |
| Grade 2           | 25                 |
| Grade 3           | 16                 |

1  
2  
3

**Table S2.** Raw data of hERG1 scoring and *Kras* mutational status in our TMA series.

| Sample Id | KRAS status    | Mutation type  | hERG1 score | hERG1 expression |
|-----------|----------------|----------------|-------------|------------------|
| 08 B 4818 | Not determined | Not determined | 9           | +                |
| 08 B 3922 | MUTATED        | G12D (12Asp)   | 8           | +                |
| 08 B 3894 | MUTATED        | G12D (12Asp)   | 0           | -                |
| 08 B 3004 | MUTATED        | G12V (12Val)   | 0           | -                |
| 08 B 2925 | Not determined | Not determined | 6           | +                |
| 08 B 2876 | MUTATED        | G12V (12Val)   | 0           | -                |
| 08 B 2113 | MUTATED        | G12V (12Val)   | 9           | +                |
| 08 B 1373 | MUTATED        | G12D (12Asp)   | 2           | -                |
| 08 B 1286 | MUTATED        | G12V (12Val)   | 0           | -                |
| 07 B 4404 | MUTATED        | G12R (12Arg)   | 12          | +                |
| 07 B 2017 | Not determined | Not determined | 8           | +                |
| 07 B 1629 | Not determined | Not determined | 6           | +                |
| 07 B 0631 | Not determined | Not determined | 12          | +                |
| 07 B 0321 | MUTATED        | G12D (12Asp)   | 6           | +                |
| 06 B 5473 | MUTATED        | G12D (12Asp)   | 12          | +                |
| 03 B 0058 | MUTATED        | G12V (12Val)   | 6           | +                |
| 01 B 2152 | Not determined | Not determined | 4           | -                |
| 04 B 2023 | MUTATED        | G12D (12Asp)   | 8           | +                |
| 02 B 4149 | MUTATED        | G12D (12Asp)   | 8           | +                |
| 04 B 0587 | Not determined | Not determined | 4           | -                |
| 04 B 1878 | Not determined | Not determined | 8           | +                |
| 04 B 4172 | Not determined | Not determined | 0           | -                |
| 05 B 0612 | MUTATED        | G12D (12Asp)   | 0           | -                |
| 02 B 2581 | MUTATED        | G12V (12Val)   | 9           | +                |
| 98 B 0252 | Not determined | Not determined | 6           | +                |
| 06 B 4256 | MUTATED        | G12D (12Asp)   | 6           | +                |
| 06 B 5392 | Not determined | Not determined | 4           | -                |
| 05 B 1001 | Not determined | Not determined | 4           | -                |
| 07 B 2305 | Not determined | Not determined | 1           | -                |
| 05 B 4424 | MUTATED        | G12V (12Val)   | 6           | +                |
| 00 B 0819 | MUTATED        | G12D (12Asp)   | 8           | +                |
| 10 B 1732 | MUTATED        | G12R (12Arg)   | 8           | +                |
| 05 B 3864 | MUTATED        | G12V (12Val)   | 3           | -                |
| 04 B 1985 | Not determined | Not determined | 2           | -                |
| 09 B 2856 | Not determined | Not determined | 4           | -                |
| 05 B 3438 | Not determined | Not determined | 12          | +                |
| 09 B 4797 | Not determined | Not determined | 2           | -                |
| 02 B 3809 | Not determined | Not determined | 8           | +                |
| 05 B 2893 | Not determined | Not determined | 8           | +                |
| 09 B 7606 | MUTATED        | G12V (12Val)   | 12          | +                |
| 09 B 3836 | Not determined | Not determined | 8           | +                |
| 01 B 3563 | MUTATED        | G12D (12Asp)   | 4           | -                |
| 09 B 1061 | MUTATED        | G12D (12Asp)   | 3           | -                |
| 06 B 1757 | MUTATED        | G12R (12Arg)   | 12          | +                |

4  
5  
6  
7  
8

**Table S3.** Distribution of hERG1 scoring and expression according to *Kras* mutational status in a small group of samples.

| Sample Id    | KRAS status | Mutation type | Mutation rate | hERG1 score | hERG1 expression |
|--------------|-------------|---------------|---------------|-------------|------------------|
| 2012 B 11294 | WILD TYPE   | --            | --            | 8           | +                |
| 2013 B 902   | WILD TYPE   | --            | --            | 8           | +                |
| 2012 B 8973  | WILD TYPE   | --            | --            | 6           | +                |
| 2008 B 4818  | WILD TYPE   | --            | --            | 8           | +                |
| 2006 B 4256  | WILD TYPE   | --            | --            | 9           | +                |
| 2010 B 8744  | MUTATED     | G12C (12Cys)  | 24.5%         | 6           | +                |
| 2012 B 8604  | MUTATED     | G12C (12Cys)  | 52.0%         | 12          | +                |
| 2009 B 7606  | MUTATED     | G12D (12Asp)  | 42.3%         | 2           | -                |
| 2008 B 3004  | MUTATED     | G12D (12Asp)  | 47.4%         | 6           | +                |

9  
10

1 **References**

2

3 Hingorani SR, Petricoin EF, Maitra A, Rajapakse V, King C, Jacobetz MA, Ross S, Conrads  
4 TP, Veenstra TD, Hitt BA, Kawaguchi Y, Johann D, Liotta LA, Crawford HC, Putt ME, Jacks  
5 T, Wright CV, Hruban RH, Lowy AM, Tuveson DA (2003) Preinvasive and invasive ductal  
6 pancreatic cancer and its early detection in the mouse. *Cancer Cell* **4**: 437-450.

7

8 Hingorani SR, Wang L, Multani AS, Combs C, Deramaudt TB, Hruban RH, Rustgi AK, Chang  
9 S, Tuveson DA (2005) Trp53R172H and KrasG12D cooperate to promote chromosomal instability  
10 and widely metastatic pancreatic ductal adenocarcinoma in mice. *Cancer Cell* **7**: 469-483.

11

12 Lastraioli E, Bencini L, Bianchini E, Romoli MR, Crociani O, Giommoni E, Messerini L, Gasperoni  
13 S, Moretti R, Di Costanzo F, Boni L, Arcangeli A (2012) hERG1 Channels and Glut-1 as  
14 Independent Prognostic Indicators of Worse Outcome in Stage I and II Colorectal Cancer: A Pilot  
15 Study. *Transl Oncol* **5**: 105-112.

16
